# Supplementary material for: Coordinated transcriptional regulation of bone homeostasis by Ebf1 and Zfp521 in both mesenchymal and hematopoietic lineages
Source: PubMed Central journal article supplement — J Exp Med. 2013 May 6;210(5):969–85. doi: 10.1084/jem.20121187 (PMC3646489; doi:10.1084/jem.20121187), 2013-05-06
Supplement: supp_jem.20121187_JEM_20121187_sm.pdf [file supp_jem.20121187_JEM_20121187_sm.pdf]

## SUPPLEMENTAL MATERIAL

Kiviranta et al., <http://www.jem.org/cgi/content/full/jem.20121187/DC1>**Table S1.** Full histomorphometric data from 3-wk-old Zfp521<sup>-/-</sup> and control mice

| Parameter        | Control           | Zfp521 <sup>-/-</sup>          |
|------------------|-------------------|--------------------------------|
| BV/TV (%)        | 5.89 ± 1.28       | 3.46 ± 1.53 <sup>c</sup>       |
| Tb. Th (μm)      | 27.50 ± 2.51      | 22.07 ± 2.12 <sup>b</sup>      |
| Tb. Sp (μm)      | 463.55 ± 149.92   | 713.10 ± 315.63                |
| Tb. N (per mm)   | 2.92 ± 0.73       | 1.61 ± 0.85 <sup>a</sup>       |
| MS/BS (%)        | 26.52 ± 3.30      | 26.60 ± 4.71                   |
| MAR (μm/d)       | 4.89 ± 0.27       | 2.52 ± 0.54 <sup>c</sup>       |
| BFR/BV (%/yr)    | 3,465.90 ± 545.75 | 2,165.15 ± 179.01 <sup>b</sup> |
| BFR/TV (%/yr)    | 208.28 ± 66.11    | 73.56 ± 28.21 <sup>b</sup>     |
| N.Ob/BS (per mm) | 13.08 ± 3.35      | 21.38 ± 6.32 <sup>a</sup>      |
| Ob.S/BS (%)      | 26.51 ± 6.52      | 38.50 ± 10.74                  |
| OS/BS (%)        | 7.21 ± 2.61       | 26.38 ± 11.21 <sup>a</sup>     |
| N.Oc/BS (per mm) | 0.65 ± 0.11       | 1.22 ± 0.44 <sup>a</sup>       |
| Oc.S/BS (%)      | 0.89 ± 0.18       | 2.17 ± 0.91 <sup>a</sup>       |
| ES/BS (%)        | 1.06 ± 0.32       | 2.99 ± 1.41 <sup>a</sup>       |

MS, mineralizing surface; N.Ob, number of OBs; N.Oc, number of OCs; Ob.S, OB surface; Oc.S, OC surface; OS, osteoid surface; Tb. N, trabecular number; Tb. Sp, trabecular separation; Tb. Th, trabecular thickness; TV, tissue volume.

<sup>a</sup>P < 0.05 versus control.

<sup>b</sup>P < 0.01 versus control.

<sup>c</sup>P < 0.001 versus control.

**Table S2.** Full histomorphometric data from 6-wk-old Zfp521<sup>hOC</sup><sup>-/-</sup> and control mice

| Parameter        | Control           | Zfp521 <sup>hOC</sup> <sup>-/-</sup> |
|------------------|-------------------|--------------------------------------|
| BV/TV (%)        | 8.51 ± 2.40       | 5.03 ± 1.56 <sup>a</sup>             |
| Tb. Th (μm)      | 35.40 ± 5.31      | 28.00 ± 4.25 <sup>a</sup>            |
| Tb. Sp (μm)      | 401.88 ± 99.10    | 565.48 ± 160.80                      |
| Tb. N (per mm)   | 2.38 ± 0.50       | 1.77 ± 0.37 <sup>a</sup>             |
| MS/BS (%)        | 30.55 ± 5.46      | 22.36 ± 5.99 <sup>a</sup>            |
| MAR (μm/d)       | 3.42 ± 1.47       | 1.72 ± 0.87 <sup>a</sup>             |
| BFR/BV (%/yr)    | 1,972.37 ± 570.22 | 970.42 ± 427.65 <sup>c</sup>         |
| BFR/TV (%/yr)    | 167.31 ± 100.01   | 57.82 ± 50.05 <sup>a</sup>           |
| N.Ob/BS (per mm) | 8.80 ± 2.68       | 16.12 ± 3.58 <sup>b</sup>            |
| Ob.S/BS (%)      | 14.92 ± 5.32      | 24.65 ± 6.58 <sup>a</sup>            |
| OS/BS (%)        | 2.38 ± 1.53       | 1.58 ± 0.28                          |
| N.Oc/BS (per mm) | 0.38 ± 0.14       | 0.34 ± 0.03                          |
| Oc.S/BS (%)      | 0.54 ± 0.19       | 0.47 ± 0.17                          |
| ES/BS (%)        | 0.47 ± 0.18       | 0.44 ± 0.04                          |

MS, mineralizing surface; N.Ob, number of OBs; N.Oc, number of OCs; Ob.S, OB surface; Oc.S, OC surface; OS, osteoid surface; Tb. N, trabecular number; Tb. Sp, trabecular separation; Tb. Th, trabecular thickness; TV, tissue volume.

<sup>a</sup>P < 0.05 versus control.

<sup>b</sup>P < 0.01 versus control.

<sup>c</sup>P < 0.001 versus control.

**Table S3.** Full histomorphometric data from 12-wk-old Zfp521<sup>hOC</sup><sup>-/-</sup> and control mice

| Parameter        | Control        | Zfp521 <sup>hOC</sup> <sup>-/-</sup> |
|------------------|----------------|--------------------------------------|
| BV/TV (%)        | 7.31 ± 1.87    | 5.43 ± 0.71 <sup>a</sup>             |
| Tb. Th (μm)      | 32.92 ± 6.60   | 29.80 ± 2.00                         |
| Tb. Sp (μm)      | 442.73 ± 54.16 | 528.07 ± 59.94 <sup>a</sup>          |
| Tb. N (per mm)   | 2.13 ± 0.23    | 1.83 ± 0.22 <sup>a</sup>             |
| MS/BS (%)        | 11.44 ± 3.34   | 6.29 ± 1.63 <sup>b</sup>             |
| MAR (μm/d)       | 1.10 ± 0.23    | 0.67 ± 0.43 <sup>a</sup>             |
| BFR/BV (%/yr)    | 279.90 ± 93.39 | 119.15 ± 108.40 <sup>a</sup>         |
| BFR/TV (%/yr)    | 17.89 ± 7.38   | 6.82 ± 7.68 <sup>a</sup>             |
| N.Ob/BS (per mm) | 11.40 ± 4.30   | 8.23 ± 0.96                          |
| Ob.S/BS (%)      | 18.56 ± 7.60   | 13.24 ± 1.68                         |
| OS/BS (%)        | 15.67 ± 5.63   | 5.04 ± 1.63 <sup>b</sup>             |
| N.Oc/BS (per mm) | 0.36 ± 0.15    | 0.26 ± 0.09                          |
| Oc.S/BS (%)      | 0.79 ± 0.38    | 0.56 ± 0.14                          |
| ES/BS (%)        | 0.89 ± 0.49    | 0.59 ± 0.18                          |

MS, mineralizing surface; N.Ob, number of OBs; N.Oc, number of OCs; Ob.S, OB surface; Oc.S, OC surface; OS, osteoid surface; Tb. N, trabecular number; Tb. Sp, trabecular separation; Tb. Th, trabecular thickness; TV, tissue volume.

<sup>a</sup>P < 0.05 versus control.

<sup>b</sup>P < 0.01 versus control.

**Table S4.** Full histomorphometric data from 6-wk-old Zfp521<sup>OSx</sup><sup>-/-</sup> and control mice

| Parameter        | Control           | Zfp521 <sup>OSx</sup> <sup>-/-</sup> |
|------------------|-------------------|--------------------------------------|
| BV/TV (%)        | 5.55 ± 1.08       | 3.89 ± 0.81 <sup>a</sup>             |
| Tb. Th (μm)      | 27.78 ± 3.57      | 25.87 ± 3.31                         |
| Tb. Sp (μm)      | 492.20 ± 112.05   | 662.93 ± 164.96                      |
| Tb. N (per mm)   | 1.99 ± 0.39       | 1.51 ± 0.39                          |
| MS/BS (%)        | 30.11 ± 4.55      | 19.01 ± 3.93 <sup>b</sup>            |
| MAR (μm/d)       | 1.48 ± 0.24       | 1.06 ± 0.26 <sup>a</sup>             |
| BFR/BV (%/yr)    | 1,138.68 ± 177.47 | 533.81 ± 214.53 <sup>b</sup>         |
| BFR/TV (%/yr)    | 60.15 ± 3.74      | 27.66 ± 15.15 <sup>b</sup>           |
| N.Ob/BS (per mm) | 11.55 ± 3.76      | 13.44 ± 5.30                         |
| Ob.S/BS (%)      | 17.44 ± 5.43      | 20.07 ± 8.68                         |
| OS/BS (%)        | 10.31 ± 4.09      | 10.20 ± 6.26                         |
| N.Oc/BS (per mm) | 0.24 ± 0.06       | 0.42 ± 0.10 <sup>b</sup>             |
| Oc.S/BS (%)      | 0.46 ± 0.13       | 0.71 ± 0.12 <sup>b</sup>             |
| ES/BS (%)        | 0.49 ± 0.21       | 0.80 ± 0.17 <sup>a</sup>             |

MS, mineralizing surface; N.Ob, number of OBs; N.Oc, number of OCs; Ob.S, OB surface; Oc.S, OC surface; OS, osteoid surface; Tb. N, trabecular number; Tb. Sp, trabecular separation; Tb. Th, trabecular thickness; TV, tissue volume.

<sup>a</sup>P < 0.05 versus control.

<sup>b</sup>P < 0.01 versus control.

**Table S5.** Full histomorphometric data from 6-wk-old control, Zfp521<sup>+/-</sup>, Ebf1<sup>+/-</sup>, and Zfp521<sup>+/-</sup>:Ebf1<sup>+/-</sup> mice

| Parameter        | Control           | Zfp521 <sup>+/-</sup>          | Ebf1 <sup>+/-</sup>              | Zfp521 <sup>+/-</sup> :Ebf1 <sup>+/-</sup> |
|------------------|-------------------|--------------------------------|----------------------------------|--------------------------------------------|
| BV/TV (%)        | 5.89 ± 1.15       | 4.26 ± 0.28 <sup>a,i</sup>     | 9.21 ± 2.96 <sup>b,f</sup>       | 6.74 ± 0.85 <sup>f</sup>                   |
| Tb. Th (µm)      | 28.31 ± 4.41      | 25.51 ± 3.39 <sup>g</sup>      | 31.81 ± 5.88 <sup>d</sup>        | 26.85 ± 1.52                               |
| Tb. Sp (µm)      | 455.76 ± 40.48    | 577.05 ± 90.26 <sup>b,i</sup>  | 324.63 ± 50.25 <sup>b,f</sup>    | 375.51 ± 48.91 <sup>f</sup>                |
| Tb. N (per mm)   | 2.07 ± 0.17       | 1.70 ± 0.27 <sup>a,i</sup>     | 2.84 ± 0.37 <sup>c,f</sup>       | 2.51 ± 0.28 <sup>a,f</sup>                 |
| MS/BS (%)        | 28.48 ± 3.55      | 20.73 ± 2.97 <sup>b,i</sup>    | 34.98 ± 4.86 <sup>a,e</sup>      | 29.63 ± 4.81 <sup>a,e</sup>                |
| MAR (µm/d)       | 1.38 ± 0.27       | 1.01 ± 0.42 <sup>g</sup>       | 1.76 ± 0.31 <sup>d</sup>         | 1.44 ± 0.47                                |
| BFR/BV (%/yr)    | 1,038.25 ± 270.73 | 594.71 ± 260.08 <sup>a,i</sup> | 1,407.40 ± 158.40 <sup>a,f</sup> | 1,149.41 ± 381.48 <sup>e</sup>             |
| BFR/TV (%/yr)    | 58.10 ± 18.35     | 25.89 ± 12.78 <sup>a,i</sup>   | 128.51 ± 39.63 <sup>c,f</sup>    | 79.76 ± 37.29 <sup>e,g</sup>               |
| N.Ob/BS (per mm) | 13.79 ± 3.08      | 21.37 ± 5.27 <sup>b</sup>      | 18.72 ± 4.83 <sup>a</sup>        | 15.24 ± 2.65 <sup>d</sup>                  |
| Ob.S/BS (%)      | 21.62 ± 4.62      | 32.62 ± 9.94 <sup>b</sup>      | 30.07 ± 3.08 <sup>a</sup>        | 23.99 ± 6.94 <sup>d</sup>                  |
| OS/BS (%)        | 14.23 ± 3.62      | 24.83 ± 9.47 <sup>b</sup>      | 21.19 ± 3.13 <sup>a</sup>        | 17.59 ± 5.98                               |
| N.Oc/BS (per mm) | 0.42 ± 0.14       | 0.64 ± 0.08 <sup>b,i</sup>     | 0.24 ± 0.06 <sup>a,f</sup>       | 0.43 ± 0.12 <sup>e,h</sup>                 |
| Oc.S/BS (%)      | 0.82 ± 0.28       | 1.34 ± 0.16 <sup>c,i</sup>     | 0.45 ± 0.17 <sup>b,f</sup>       | 0.77 ± 0.11 <sup>f,h</sup>                 |
| ES/BS (%)        | 0.92 ± 0.30       | 1.49 ± 0.22 <sup>c,i</sup>     | 0.46 ± 0.16 <sup>b,f</sup>       | 0.84 ± 0.12 <sup>f,h</sup>                 |

MS, mineralizing surface; N.Ob, number of OBs; N.Oc, number of OCs; Ob.S, OB surface; Oc.S, OC surface; OS, osteoid surface; Tb. N, trabecular number; Tb. Sp, trabecular separation; Tb. Th, trabecular thickness; TV, tissue volume.

<sup>a</sup>P < 0.05 versus control.

<sup>b</sup>P < 0.01 versus control.

<sup>c</sup>P < 0.001 versus control.

<sup>d</sup>P < 0.05 versus Zfp521<sup>+/-</sup>.

<sup>e</sup>P < 0.01 versus Zfp521<sup>+/-</sup>.

<sup>f</sup>P < 0.001 versus Zfp521<sup>+/-</sup>.

<sup>g</sup>P < 0.05 versus Ebf1<sup>+/-</sup>.

<sup>h</sup>P < 0.01 versus Ebf1<sup>+/-</sup>.

<sup>i</sup>P < 0.001 versus Ebf1<sup>+/-</sup>.

**Table S6.** Full histomorphometric data from 6-wk-old Coll2.3-Ebf1 and control mice

| Parameter        | Control           | Coll-Ebf                     |
|------------------|-------------------|------------------------------|
| BV/TV (%)        | 7.09 ± 1.04       | 5.33 ± 1.32 <sup>a</sup>     |
| Tb. Th (µm)      | 31.14 ± 1.62      | 28.94 ± 4.19                 |
| Tb. Sp (µm)      | 414.55 ± 52.55    | 531.75 ± 106.71 <sup>a</sup> |
| Tb. N (per mm)   | 2.27 ± 0.26       | 1.83 ± 0.31 <sup>a</sup>     |
| MS/BS (%)        | 25.85 ± 4.42      | 17.18 ± 5.84 <sup>b</sup>    |
| MAR (µm/d)       | 2.07 ± 0.33       | 1.50 ± 0.44 <sup>a</sup>     |
| BFR/BV (%/yr)    | 1,214.17 ± 149.64 | 715.52 ± 289.42 <sup>b</sup> |
| BFR/TV (%/yr)    | 88.73 ± 23.17     | 39.65 ± 18.49 <sup>b</sup>   |
| N.Ob/BS (per mm) | 14.11 ± 4.20      | 22.54 ± 6.31 <sup>a</sup>    |
| Ob.S/BS (%)      | 20.48 ± 6.18      | 32.71 ± 9.36 <sup>a</sup>    |
| OS/BS (%)        | 12.21 ± 5.45      | 22.80 ± 9.09 <sup>a</sup>    |
| N.Oc/BS (per mm) | 0.44 ± 0.15       | 0.32 ± 0.11                  |
| Oc.S/BS (%)      | 0.76 ± 0.29       | 0.56 ± 0.16                  |
| ES/BS (%)        | 0.86 ± 0.34       | 0.58 ± 0.13                  |

MS, mineralizing surface; N.Ob, number of OBs; N.Oc, number of OCs; Ob.S, OB surface; Oc.S, OC surface; OS, osteoid surface; Tb. N, trabecular number; Tb. Sp, trabecular separation; Tb. Th, trabecular thickness; TV, tissue volume.

<sup>a</sup>P < 0.05 versus control.

<sup>b</sup>P < 0.01 versus control.
